# Supplementary material for: Neoadjuvant Chemotherapy Use in Bladder Cancer: A Survey of Current Practice and Opinions
Source: Hindawi journal article supplement (doi:10.1155/2014/746298), 2014-01-01
Supplement: f1 [file 746298.f1.pdf]

# 1. Neoadjuvant and adjuvant chemotherapy for T2-T4N0M0 bladder cancer

## 1. What is your practice setting?

- University
- Government
- Veteran's Administration
- Other non-profit
- Private practice

## 2. Select the response that describes your training:

- Urology residency
- Fellowship training (non-oncology)
- Urologic oncology fellowship
- Other

Other (please specify)

## 3. What is your age?

- <40 years
- 40-50 years
- 50-60 years
- 60-70 years
- >70 years

## 4. Approximately how many radical cystectomies do you perform per year?

- <1
- 1-3
- 4-7
- 8-10
- >10

## 5. Do you have a dedicated GU medical oncologist at your institution?

- Yes
- No

**6. Do you have regular GU multidisciplinary tumor board meetings/rounds at your institution?**

- Yes
- No

**7. Do the medical oncologists at your institution RECOMMEND NEOADJUVANT chemotherapy for muscle invasive bladder cancer?**

- Yes
- No
- The medical oncologists at my institution are ambivalent

**8. Which statement most closely characterizes how you incorporate NEOADJUVANT chemotherapy into your practice? (Select all that apply)**

- I do not recommend neoadjuvant chemotherapy
- I DISCUSS neoadjuvant chemotherapy with all patients for whom radical cystectomy is an option.
- I RECOMMEND neoadjuvant chemotherapy for all ELIGIBLE patients undergoing radical cystectomy for localized muscle invasive bladder cancer (T2-4, N0, M0).
- I use neoadjuvant chemotherapy to downstage locally advanced disease prior to cystectomy.
- I use neoadjuvant chemotherapy to select patients with metastatic disease who may be candidates for consolidative cystectomy.

**9. When you counsel patients about radical cystectomy, with what proportion do you DISCUSS NEOADJUVANT chemotherapy?**

- 0
- <30%
- 31-60%
- 61-89%
- >90%

**10. What proportion of your patients undergoing radical cystectomy HAVE RECEIVED NEOADJUVANT chemotherapy prior to surgery?**

- 0
- <30%
- 31-60%
- 61-89%
- >90%

**11. When counseling a patient with localized bladder cancer, to which patients do you RECOMMEND NEOADJUVANT chemotherapy? (Select all that apply)**

- I never recommend neoadjuvant chemotherapy
- High risk superficial disease (T1 or less)
- Clinical T2 disease
- Clinical T3/T4

Other (please specify)

**12. Which of the following factors would influence your decision towards NEOADJUVANT chemotherapy for a patient with localized muscle invasive bladder cancer? (Select all that apply)**

- Lymphovascular invasion
- Carcinoma on situ
- Multifocality
- Tumor volume/size
- Tumor grade
- Presence of hydronephrosis
- Palpable/fixed mass (T3 disease)
- None of the above

**\*13. What are your major concerns about RECOMMENDING NEOADJUVANT chemotherapy? (Select all that apply)**

- Preoperative chemotherapy is too toxic for the surgical patient
- Risk of surgical complications after chemotherapy
- Age and comorbidity of patients undergoing cystectomy in my practice
- Improvement from neoadjuvant chemotherapy is marginal
- Clinical trials to date flawed: no surgical controls
- Clinical trials to date flawed: TUR staging inaccuracies.
- Neoadjuvant chemotherapy delays surgery
- Patients referred to me are already delayed due to prolonged diagnosis and referral process
- Patients are referred to me for cystectomy, not chemotherapy
- Adjuvant therapy selects patients more appropriately for treatment
- Adjuvant therapy is better than neoadjuvant therapy
- Medical oncologist overburdened
- Medical oncologist doesn't recommend neoadjuvant chemotherapy
- Process takes too long, process with medical oncology not coordinated.
- Medical oncologists in my community administer non-standard chemotherapy (eg carboplatin)

Other (please specify)

**\*14. What are the TOP reasons that you do NOT RECOMMEND NEOADJUVANT chemotherapy for patients with muscle invasive disease.**

One

Two

Three

**15. What are your TOP reasons that your patients do NOT RECEIVE NEOADJUVANT chemotherapy prior to cystectomy for muscle invasive bladder cancer?**

One

Two

Three

**16. When counseling cystectomy candidates, what proportion of patients do you discuss ADJUVANT chemotherapy?**

- 0
- <30%
- 31-60%
- 61-89%
- >90%

**17. When faced with a post-cystectomy patient who had no evidence of metastatic disease preoperatively, to whom do you recommend ADJUVANT chemotherapy? (Select all that apply)**

- I never recommend adjuvant chemotherapy
- CIS
- Lymphovascular invasion
- pT3 disease
- pT4 disease
- N1 disease
- N2 disease
- N3 disease
- Positive surgical margin
- Grossly unresected disease
- Other

Other (please specify)

**18. What are your major concerns about administering ADJUVANT chemotherapy?**

- Adjuvant chemotherapy trials to date have been underpowered
- Comorbidity of patients after cystectomy
- Delays patient recovery
- Risk of overtreatment
- Prefer to wait for evidence of metastatic disease
- Patient preference
- Medical oncologist preference
- Medical oncologist opinion about efficacy of adjuvant treatment
- Other

Other (please specify)

**19. Do you currently administer NEOADJUVANT chemotherapy prior to nephroureterectomy for upper tract urothelial carcinoma?**

- Yes
- No
- Other

Other (please specify)

**20. Would you refer patients for NEOADJUVANT chemotherapy for urothelial carcinoma of the upper tract if there was appropriate data supporting its use?**

- Yes
- No
- Other

Other (please specify)
